# Supplementary material
Source: publisher figshare collection journal article supplement (https://acs.figshare.com/ndownloader/files/4665943)
Supplement: Supplementary file 1 [file 4665943]

## **Supporting Information**

# **High Mobility Organic Field-Effect Transistor Based on Hexamethylenetetrafulvalene with Organic Metal Electrodes**

Yukihiro Takahashi<sup>†\*</sup>, Tatsuo Hasegawa<sup>†</sup>, Sachio Horiuchi,<sup>†</sup> Reiji Kumai,<sup>†</sup>

Yoshinori Tokura,<sup>†‡</sup> and Gunji Saito<sup>§</sup>

<sup>†</sup>Correlated Electron Research Center (CERC), National Advanced Institute for Industrial Science and Technology (AIST)

<sup>‡</sup>Department of Applied Physics, The University of Tokyo

<sup>§</sup>Division of Chemistry, Kyoto University, Kyoto

E-mail: [y.takahashi@aist.go.jp](mailto:y.takahashi@aist.go.jp)

## **1. Crystal growth**

HMTTF was synthesized according to the literature<sup>9</sup>. The material was purified by recrystallization and temperature-gradient sublimation in vacuum. In the vapour-transport crystal growth, we used a glass tube with size of about 20cm in length and 1.6 cm in diameter, sealed with 3 mbar nitrogen gas. Single crystals with size of about  $0.8 \times 0.2 \times 0.2 \text{ mm}^3$  were grown around the location at about 140 °C in the temperature-gradient furnace with the source temperature at about 180 °C. In the crystal growth from solution, 3-5 mg of HMTTF powder was dissolved in 10 ml of well-purified chlorobenzene by stirring at 80 °C. After it was cooled down and filtrated, the solution was placed in desiccator for two weeks with flowing argon gas. As the solvent gradually evaporates, the single crystals were obtained.

## **2. Device fabrication**

Complex powders of tetrathiafulvalene-tetracyanoquinodimethane (TTF-TCNQ) were

obtained as precipitation by the reaction of TTF and TCNQ in acetonitrile solution, and were fully dried in vacuum. Vacuum-deposited TTF–TCNQ films with thickness of about 300 nm were obtained by direct deposition of complex powders at  $5 \times 10^{-4}$  Pa from alumina crucible which is set at 185 °C at the deposition rate of 0.3 nm/s. The sheet resistance of the obtained film is 1 ~ 1.5 k $\Omega$ . The thickness of parylene C used as the gate dielectric layer is around 1  $\mu\text{m}$  ( $C = 1.90 \sim 2.12$  nF/cm<sup>2</sup>). Both of the channel length and width is 100  $\mu\text{m}$ . The gate electrodes were fabricated by painting of a gold paste (Tokuriki).

### 3. Device characteristics with Ag or Au source/drain electrodes

Transfer characteristics of HMTTF single crystal FETs with (a) silver and (b) gold source/drain electrodes are shown in Fig 1. The mobility of the devices is estimated as 0.12 cm<sup>2</sup>/Vs for the former and 0.02 cm<sup>2</sup>/Vs for the latter.

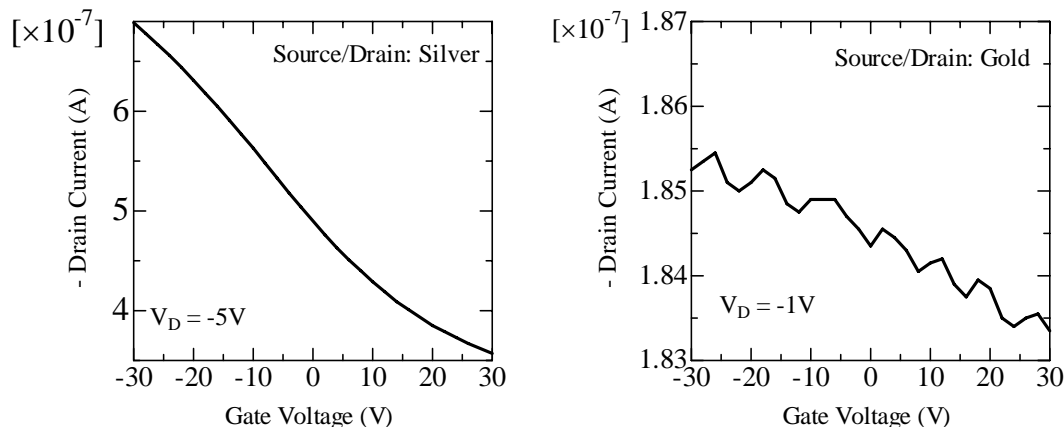

**Fig. 1.** Transfer characteristics of HMTTF single crystal FETs with (a) silver and (b) gold source/drain electrodes.

### 4. X-ray analysis

The x-ray measurements were carried out at the beam line BL-1A at the KEK (High Energy Accelerator Research Organization) Photon Factory in Japan. The incident beam was

monochromated ( $\lambda = 0.688 \text{ \AA}$ ) by a pair of Si(111) single crystals. Cylindrical imaging plate diffractometer (Rigaku) is used for the detection of the Bragg reflections. The Rapid AUTO program (Rigaku) was used for the two-dimensional image processing. The crystallographic software package of CrystalStructure<sup>TM</sup> (Rigaku/MSO) was used for refinements of the structure. The initial structure is modeled by the direct method (SIR2002) and is expanded using Fourier techniques. Non-hydrogen atoms were refined anisotropically. Hydrogen atoms were included but not refined. The final cycle of full-matrix least-squares refinement is based on 1,517 observed reflections with 157 variable parameters (reflection/parameter ratio  $\sim 9.66$ ) and the final residual value is 5.7 %. The final atomic parameters, bond lengths, and angles are summarized as the crystallographic files in .cif format.

## 5. Intermolecular overlap

The intermolecular overlap integrals were calculated on the basis of extended Hückel molecular orbital method. Calculations of the overlap between highest-occupied molecular orbitals (HOMO) were done for various combinations of neighboring HMTTF molecules based on the atomic coordinates as obtained by the structure analyses. The intermolecular transfer integral  $t_i$  were estimated by using the relation;  $t_i = -E S_i$  where  $E$  is assumed to be -10 eV.
